# Supplementary material
Source: publisher figshare collection journal article supplement (https://karger.figshare.com/ndownloader/files/36428460)
Supplement: Supplementary file 1 [file 36428460]

**Supplement S12: Continuous confounding factors on right ventricular stroke volume**

**(RV-SV) bias**

|  | RV-SV bias | | |
| --- | --- | --- | --- |
|  | coefficent | (95% CI) | p-value |
| EC Signal quality (propcycles) | 0.01 | (0.00 to 0.01) | .177 |
| Intercept (propcycles=12%) | -0.43 | (-1.01 to 0.14) |  |
| Heart rate (HREC) | -0.01 | (-0.02 to 0.00) | .227 |
| Intercept (HREC=119 bpm) | 0.15 | (-0.31 to 0.61) |  |
| RV-SVEC | 0.54 | (0.25 to 0.83) | <.001 |
| Intercept (RV-SVEC=0.67mL) | -0.58 | (-0.92 to -0.23) |  |
| RV-SVTTE | -0.77 | (-1.00 to -0.55) | <.001 |
| Intercept (RV-SVTTE=0.54mL) | 0.81 | (0.41 to 1.20) |  |

EC: Electrical Cardiometry, TTE: transthoracic echocardiography, propcycles: proportion of cycles with increasing or maximum EC signal quality within the 10s epoch
